# Supplementary material for: A narrative review on the use of probiotics in several diseases. Evidence and perspectives
Source: PubMed Central journal article supplement (PMC10368401; doi:10.3389/fnut.2023.1209238), 2023-07-10
Supplement: Table_1.pdf [file Table_1.pdf]

*Supplementary Material*

**The use of probiotics in disease and in several pathological conditions:  
proven effects, genera mostly used and perspectives**

**Daniela Campaniello\*, Antonio Bevilacqua\*, Barbara Speranza, Angela Racioppo, Milena Sinigaglia, Maria Rosaria Corbo\*\***

**\*\* Correspondence:** Maria Rosaria Corbo: [mariarosaria.corbo@unifg.it](mailto:mariarosaria.corbo@unifg.it)

**Table S1:** Effects of probiotics

| COLORECTAL DISEASE                                                                                                                                                                    |                                                                                                                                                                                                                        |              |            |
|---------------------------------------------------------------------------------------------------------------------------------------------------------------------------------------|------------------------------------------------------------------------------------------------------------------------------------------------------------------------------------------------------------------------|--------------|------------|
| PROBIOTIC STRAINS                                                                                                                                                                     | EFFECTS                                                                                                                                                                                                                | TARGET       | REFERENCES |
| <i>Bacteroides fragilis</i>                                                                                                                                                           | Reduction of inflammation<br>Anticancer effects                                                                                                                                                                        | Human        | (41)       |
| <i>Lactobacillus acidophilus</i> MTCC 5401                                                                                                                                            | Attenuation of intestinal inflammation                                                                                                                                                                                 | Human        | (42)       |
| <i>Faecalibacterium prausnitzii</i>                                                                                                                                                   | Anti-inflammatory effect                                                                                                                                                                                               | Human        | (43)       |
| <i>Lactococcus lactis</i> subsp. <i>cremoris</i> C60                                                                                                                                  | Prevention of CRC development<br>Restoration of T cell populations and regulation of IFN- $\gamma$<br>Production of TCD4+ cells                                                                                        | Human        | (44)       |
| <i>Lacticaseibacillus casei</i> ATCC334                                                                                                                                               | Inhibition of CRC cell growth<br>Induction of apoptosis by overregulation of the DDIT3 gene                                                                                                                            | Human        | (45)       |
| <i>Butyricococcus pullicaecorum</i> ( $10^8$ CFU/capsule)                                                                                                                             | Prevention of necrotic enteritis<br>Reduction of pathogens in the ileum<br>Antitumor effect due to the production of butyrate able to inhibit the growth of CRC cells through overregulation of SLC5A8 and GPR43 genes | Human        | (41)       |
| <i>Bifidobacterium longum</i> ,<br><i>Bifidobacterium bifidum</i> , <i>L. acidophilus</i><br>and <i>Lactiplantibacillus plantarum</i><br>(probiotic mixture $3 \times 10^{13}$ CFU/g) | Reduction of the tendency of CRC cells to migrate in different tissues<br>Reduction of the size of the tumor                                                                                                           | Animal model | (46)       |
| <i>Ligilactobacillus salivarius</i> ( $1 \times 10^{10}$ CFU/kg of body weight)                                                                                                       | Suppression of the dimethylhydrazine (DMH) production<br>Inhibition of cell proliferation and induction of apoptosis in DMH-induced tumor models                                                                       | Animal model | (47)       |
| <i>Bifidobacterium animalis</i> subsp. <i>lactis</i> HY8002 ( $1 \times 10^8$ CFU), <i>L. casei</i> HY2782                                                                            | Improvements in postoperative intestinal dysfunction<br>Increased production of SCFAs<br>Decreased microbes number associated with the development of CRC                                                              | Human        | (48)       |

|                                                                                                                                                                                                                                                                                                                                                                                                                                                                        |                                                                                                                                                                                                                                                   |               |                   |
|------------------------------------------------------------------------------------------------------------------------------------------------------------------------------------------------------------------------------------------------------------------------------------------------------------------------------------------------------------------------------------------------------------------------------------------------------------------------|---------------------------------------------------------------------------------------------------------------------------------------------------------------------------------------------------------------------------------------------------|---------------|-------------------|
| (5x10 <sup>7</sup> CFU) and <i>L. plantarum</i> HY7712 (5x10 <sup>7</sup> CFU) (probiotic mixture)                                                                                                                                                                                                                                                                                                                                                                     |                                                                                                                                                                                                                                                   |               |                   |
| <i>L. plantarum</i> CJLP243 (1 × 10 <sup>10</sup> for 3 weeks)                                                                                                                                                                                                                                                                                                                                                                                                         | Improvement on intestinal function and quality of life in patient subjected to rectal resection and admitted to undergo the reversal of the ileostomy<br>Any improvement of symptoms such as diarrhea, fecal incontinence and other complications | Human         | (49)              |
| <b>NEURO-PSYCHIATRIC DISEASES</b>                                                                                                                                                                                                                                                                                                                                                                                                                                      |                                                                                                                                                                                                                                                   |               |                   |
| <i>AUTISM (ASD)</i>                                                                                                                                                                                                                                                                                                                                                                                                                                                    |                                                                                                                                                                                                                                                   |               |                   |
| <b>PROBIOTIC STRAINS</b>                                                                                                                                                                                                                                                                                                                                                                                                                                               | <b>EFFECTS</b>                                                                                                                                                                                                                                    | <b>TARGET</b> | <b>REFERENCES</b> |
| <i>Bifidobacterium</i> spp.                                                                                                                                                                                                                                                                                                                                                                                                                                            | Anti-inflammatory effect                                                                                                                                                                                                                          | Human         | (55)              |
| VSL #3 [ <i>L. delbrueckii</i> subsp. <i>bulgaricus</i> (8x10 <sup>10</sup> CFU), <i>L. acidophilus</i> (8x10 <sup>10</sup> CFU), <i>Bifidobacterium breve</i> (9x10 <sup>10</sup> CFU), <i>B. longum</i> (9x10 <sup>10</sup> CFU), <i>Bifidobacterium infantis</i> (9x10 <sup>10</sup> CFU), <i>Lacticaseibacillus paracasei</i> (8x10 <sup>10</sup> CFU), <i>L. plantarum</i> (8x10 <sup>10</sup> CFU), <i>Streptococcus thermophilus</i> (20x10 <sup>10</sup> CFU)] | Significant reduction of the main symptoms of autism and severity of gastrointestinal symptoms in boys with ASD and with severe impairment of cognitive function                                                                                  | Human         | (56)              |
| <i>L. acidophilus</i> , <i>Lacticaseibacillus rhamnosus</i> , <i>B. longum</i>                                                                                                                                                                                                                                                                                                                                                                                         | Improvement of gastrointestinal disorders<br>Reduction of severity of ASD and ATEC score<br>Alteration of the fecal microbiota of children with ASD with increase of bifidobacteria and lactobacilli                                              | Human         | (57)              |
| <i>B. infantis</i> (2x10 <sup>13</sup> CFU for day)                                                                                                                                                                                                                                                                                                                                                                                                                    | Reduction of IL-13, gastrointestinal symptoms, onset of particular aberrant behaviors in children aged 2 to 11 years with ASD                                                                                                                     | Human         | (58)              |
| <i>Limosilactobacillus reuteri</i> (10 <sup>8</sup> CFU/mL), <i>B. longum</i> (10 <sup>8</sup> CFU/mL)/GOS (5 g)                                                                                                                                                                                                                                                                                                                                                       | Increased gastrointestinal resistance, positive modulation of the intestinal microbiota and metabolic activity of children with ASD                                                                                                               | Human         | (59)              |

|                                                                                                                                                                                                                                                               |                                                                                                                                                        |              |       |
|---------------------------------------------------------------------------------------------------------------------------------------------------------------------------------------------------------------------------------------------------------------|--------------------------------------------------------------------------------------------------------------------------------------------------------|--------------|-------|
| <i>L. plantarum</i> PS128 (3x10 <sup>10</sup> CFU/capsule)                                                                                                                                                                                                    | Improvement of ODD (oppositional defiant disorder) and total SNAP-IV scores for children aged 7-12                                                     | Human        | (60)  |
| <i>L. reuteri</i> (10 <sup>10</sup> CFU/g for day for 3 months)                                                                                                                                                                                               | Improvement of oxytocin-dependent behavior in ASD patients                                                                                             | Human        | (61)  |
| <i>L. rhamnosus</i> GG (ATCC 53103) (1x10 <sup>10</sup> CFU daily for 4 week)                                                                                                                                                                                 | Reduction of neuropsychiatric disorders in childhood                                                                                                   | Human        | (62)  |
| Each packet contained 450 billions of eight probiotics: <i>S. thermophilus</i> , <i>B. breve</i> , <i>B. longum</i> , <i>B. infantis</i> , <i>L. acidophilus</i> , <i>L. plantarum</i> , <i>L. paracasei</i> , <i>L. delbrueckii</i> subsp. <i>bulgaricus</i> | Decrease in total ADOS-CSS from 6.84 to 6.19 in the probiotic group compared to the placebo group                                                      | Human        | (139) |
| <i>Lactobacillus</i> spp., <i>Bifidobacterium</i> spp., <i>Streptococcus</i> spp.                                                                                                                                                                             | Reduction in the amount of <i>Desulfovibrio</i> spp.; normalization of the <i>Bacteroidetes/Firmicutes</i> ratio in children's feces                   | Human        | (140) |
| <i>B. bifidum</i> (1.9×10 <sup>8</sup> CFU/g), <i>B. infantis</i> (1.9×10 <sup>8</sup> CFU/g), <i>Lactobacillus helveticus</i> (6.4×10 <sup>9</sup> CFU/g)/FOS, Maltodextrin                                                                                  | Decreased incidence of ASD and inhibition of IL-6 and IL-17 production                                                                                 | Animal model | (141) |
| <i>Bifidobacterium</i> spp., <i>Lactobacillus</i> spp. (probiotic mixture 1 billion CFU/sachet or 1 × 10 <sup>9</sup> CFU/day)                                                                                                                                | Improvement of glutamate excitotoxicity with GABA restoration and decrease of excitatory neurotransmitter                                              | Animal model | (142) |
| <b><i>ANXIETY AND DEPRESSION</i></b>                                                                                                                                                                                                                          |                                                                                                                                                        |              |       |
| <i>Akkermansia muciniphila</i>                                                                                                                                                                                                                                | Antidepressant effect<br>Improvement of intestinal microbiota<br>Increased of BDNF<br>Inhibition of neuroinflammatory response                         | Animal model | (63)  |
| Mixture of: <i>B. bifidum</i> W23, <i>Bifidobacterium lactis</i> W52, <i>L. acidophilus</i> W37, <i>Levilactobacillus brevis</i> W63, <i>L. casei</i> W56, <i>L. salivarius</i>                                                                               | Reduction of depressive behavior in FST due to the interaction with immune system, hippocampal HPA axis regulation and microbial tryptophan metabolism | Animal model | (64)  |

|                                                                                                                                      |                                                                                                                                                                                                                                  |              |      |
|--------------------------------------------------------------------------------------------------------------------------------------|----------------------------------------------------------------------------------------------------------------------------------------------------------------------------------------------------------------------------------|--------------|------|
| W24, <i>Lactococcus lactis</i> W19, <i>Lc. lactis</i> W58 ( $2.5 \times 10^9$ CFU/g)                                                 |                                                                                                                                                                                                                                  |              |      |
| <i>L. rhamnosus</i> (dosage ranged from $1 \times 10^8$ to $1 \times 10^{10}$ CFU)                                                   | Reduction of anxious behaviour in anxiety animals                                                                                                                                                                                | Animal model | (65) |
| <i>Lactobacillus</i> spp.                                                                                                            | Improvement of behavioural abnormalities                                                                                                                                                                                         | Human        | (66) |
| <i>B. bifidum</i> ( $2 \times 10^9$ CFU/g), <i>L. acidophilus</i> ( $2 \times 10^9$ CFU/g), <i>L. casei</i> ( $2 \times 10^9$ CFU/g) | Reduction of depression symptoms, of plasma insulin and glutathione                                                                                                                                                              | Human        | (67) |
| <i>Lactobacillus</i> spp., <i>Bifidobacterium</i> spp.                                                                               | Antidepressant effects                                                                                                                                                                                                           | Human        | (68) |
| <i>L. helveticus</i> , <i>B. longum</i> (ten billion CFU per 5 g sachet.                                                             | Reduction of BDI scores (17.39- 9.1) compared to the prebiotic group (19.72-14.14) and the placebo group (18.18-15.55)                                                                                                           | Human        | (69) |
| <i>B. bifidum</i> BGN4, <i>B. longum</i> BORI (a total of $1 \times 10^9$ CFU)                                                       | Reduction of intestinal bacteria responsible for inflammation<br>Improved mental flexibility test<br>Increased serum BDNF level, stress relief in the elderly                                                                    | Human        | (70) |
| <i>L. plantarum</i> P8 ( $2 \times 10^{10}$ CFU/sachet/day)                                                                          | Reduction of anxiety and stress symptoms, plasma cortisol levels<br>Improvement of serotonin,<br>Increased of IL-10                                                                                                              | Human        | (71) |
| <b>DEMENTIA AND COGNITIVE DETERIORATION</b>                                                                                          |                                                                                                                                                                                                                                  |              |      |
| <i>Enterococcus faecium</i> ( $4 \times 10^8$ CFU)/Inulin                                                                            | Improvement in spatial learning and memory, inflammatory state, and levels of BDNF and butyrate                                                                                                                                  | Human        | (72) |
| <i>B. breve</i> A1 (2 capsules daily containing $>2.0 \times 10^{10}$ CFU)                                                           | Improvement of language, attention, guidance in the elderly                                                                                                                                                                      | Human        | (73) |
| <i>L. casei</i> LC122, <i>B. longum</i> BL986 (probiotic mixture of $2 \times 10^9$ CFU mouse <sup>-1</sup> d <sup>-1</sup> )        | Improvement of the accumulation of liver lipids, strength and muscle function Attenuation of oxidative stress and inflammation in peripheral tissues Improvement of the intestinal barrier.<br>Better learning and memory skills | Animal model | (74) |
| <i>Clostridium butyricum</i> ranged from $1 \times 10^6$ - $1 \times 10^8$ CFU                                                       | Improvement of memory and spatial learning<br>Attenuation of morphological changes of hippocampus and cellular apoptosis Increased in BDNF levels                                                                                | Animal model | (75) |

| <b><i>PARKINSON'S DISEASE</i></b>                                                                                                                        |                                                                                                                                                                                                                                           |              |      |
|----------------------------------------------------------------------------------------------------------------------------------------------------------|-------------------------------------------------------------------------------------------------------------------------------------------------------------------------------------------------------------------------------------------|--------------|------|
| <i>L. acidophilus</i> , <i>B. bifidum</i> , <i>Lim. reuteri</i> , <i>Limosilactobacillus fermentum</i> <i>B. bifidum</i> ( $2 \times 10^9$ CFU/day each) | Positive impact on MDS-UPDRS scores                                                                                                                                                                                                       | Human        | (76) |
| <i>L. salivarius</i> , <i>L. acidophilus</i>                                                                                                             | Reduction of pro-inflammatory cytokine levels (IL-6, TNF- $\alpha$ , IL-17A) and ROS<br>Increased of anti-inflammatory cytokines (IL-4 and IL-10) in PBMC                                                                                 | Human        | (77) |
| <i>Lactobacillus</i> spp., <i>Bifidobacterium</i> spp.                                                                                                   | Improvement of intestinal integrity<br>Reduction of anxiety, depression and stress<br>Regulation of GABA receptor expression in SNS                                                                                                       | Animal model | (78) |
| <b><i>ANOREXIA NERVOSA (AN)</i></b>                                                                                                                      |                                                                                                                                                                                                                                           |              |      |
| <i>L. plantarum</i> P8 (10 log CFU daily)                                                                                                                | Alleviation of AN related anxiety and stress                                                                                                                                                                                              | Human        | (81) |
| <i>B. fragilis</i>                                                                                                                                       | Correction of gastrointestinal function and restoration of serotonin production                                                                                                                                                           | Human        | (82) |
| <i>Lactobacillus</i> spp. (range between $1 \times 10^6$ - $2 \times 10^{12}$ CFU)                                                                       | Promotion of weight gain                                                                                                                                                                                                                  | Animal model | (83) |
| <i>Lactobacillus</i> spp. (for <i>L. reuteri</i> $2 \times 10^{12}$ CFU/mouse/day)                                                                       | Improvement of behavioral abnormalities in stressed mice thanks to the inhibition of the enzyme IDO1 responsible for the conversion of TRP to KYN, achieving a decrease in the circulating level of KYN and modulating the gut-brain axis | Animal model | (84) |
| <i>A. muciniphila</i>                                                                                                                                    | Restoration of the intestinal barrier, the expression of proteins at a narrow junction, increasing the thickness of mucus. $2 \times 10^8$ bacterial cells per day partly protecting against diet-induced obesity in mice                 | Animal model | (85) |
| <b><i>ALZHEIMER DISEASE (AD)</i></b>                                                                                                                     |                                                                                                                                                                                                                                           |              |      |
| <i>L. acidophilus</i> , <i>B. bifidum</i> , <i>B. longum</i> 500 mg probiotics ( $15 \times 10^9$ CFU for 6 weeks).                                      | Improved spatial and memory learning, long-term enhancement and lipid profiles                                                                                                                                                            | Animal model | (86) |
| <i>L. acidophilus</i> , <i>B. bifidum</i> , <i>B. longum</i> ( $2 \times 10^9$ CFU/day each)                                                             | Improved cognitive function in AD patients with increased MMSE scores                                                                                                                                                                     | Human        | (87) |

| <b>SCHIZOPHRENIA</b>                                                                                                                                                                                                                                                                                                                                          |                                                                                                                                      |               |                   |
|---------------------------------------------------------------------------------------------------------------------------------------------------------------------------------------------------------------------------------------------------------------------------------------------------------------------------------------------------------------|--------------------------------------------------------------------------------------------------------------------------------------|---------------|-------------------|
| <i>Lactobacillus rhamnosus</i> GG<br><i>Bifidobacterium animalis</i> subsp. <i>lactis</i><br>Bb12                                                                                                                                                                                                                                                             | Improvement of the typical symptoms of schizophrenia                                                                                 | Human         | (88)              |
| <b>MULTIPLE SCLEROSIS (MS)</b>                                                                                                                                                                                                                                                                                                                                |                                                                                                                                      |               |                   |
| Mixture of: <i>L. paracasei</i> , <i>L. plantarum</i> , <i>L. acidophilus</i> , <i>Lactobacillus delbrueckii</i> , <i>B. longum</i> , <i>B. infantis</i> , <i>B. breve</i> , <i>S. thermophilus</i> (900 billion CFU per sachet)                                                                                                                              | Improvement of MS symptoms through modulation of the intestinal microbiota and anti-inflammatory immune response in patients with MS | Human         | (89)              |
| <b>INTESTINAL DISEASES</b>                                                                                                                                                                                                                                                                                                                                    |                                                                                                                                      |               |                   |
| <b>INFLAMMATORY BOWEL DISEASE (IBD)</b>                                                                                                                                                                                                                                                                                                                       |                                                                                                                                      |               |                   |
| <b>PROBIOTIC STRAINS</b>                                                                                                                                                                                                                                                                                                                                      | <b>EFFECTS</b>                                                                                                                       | <b>TARGET</b> | <b>REFERENCES</b> |
| <i>F. prausnitzii</i>                                                                                                                                                                                                                                                                                                                                         | Anti-inflammatory effect                                                                                                             | Human         | (43)              |
| <i>A. muciniphila</i>                                                                                                                                                                                                                                                                                                                                         | Release of vesicles with anti-inflammatory activity                                                                                  | Animal model  | (92)              |
| <i>A. muciniphila</i>                                                                                                                                                                                                                                                                                                                                         | Immune and metabolic regulation with increased intestinal barrier                                                                    | Human         | (93)              |
| VSL #3 ( <i>L. casei</i> , <i>L. plantarum</i> , <i>L. acidophilus</i> , <i>L. delbrueckii</i> subsp. <i>bulgaricus</i> , <i>B. longum</i> subsp. <i>longum</i> , <i>B. breve</i> , <i>B. longum</i> subsp. <i>infantis</i> , <i>S. salivarius</i> subsp. <i>thermophilus</i> ) (probiotic mixture containing $9 \times 10^{14}$ viable lyophilized bacteria) | Maintaining state of remission                                                                                                       | Human         | (94)              |
| <i>L. acidophilus</i>                                                                                                                                                                                                                                                                                                                                         | Restored the balance of inflammatory cytokines                                                                                       | Animal model  | (95)              |

| <b>IRRITABLE BOWEL DISEASE (IBS)</b>                                                                                                                                                                                                                                             |                                                                                                                                     |               |                   |
|----------------------------------------------------------------------------------------------------------------------------------------------------------------------------------------------------------------------------------------------------------------------------------|-------------------------------------------------------------------------------------------------------------------------------------|---------------|-------------------|
| Probiotico F1 = <i>L. acidophilus</i> ( $5 \times 10^9$ CFU), <i>L. reuteri</i> ( $5 \times 10^9$ CFU)<br>Probiotico F2 = <i>L. plantarum</i> ( $5 \times 10^9$ CFU), <i>L. rhamnosus</i> ( $5 \times 10^9$ CFU), <i>B. animalis</i> subsp. <i>lactis</i> ( $5 \times 10^9$ CFU) | In both groups there was an improvement in symptoms such as bloating, abdominal pain, constipation, abdominal cramps and flatulence | Human         | (97)              |
| <i>Bacillus coagulans</i> MTCC5856 (tablet containing $2 \times 10^9$ CFU/day for 90 days)                                                                                                                                                                                       | Improvement of IBS symptoms<br>Reduction of: bloating, vomiting, diarrhea, abdominal pain, stool frequency                          | Human         | (98)              |
| <i>L. plantarum</i> DSM 9843 ( $5 \times 10^7$ CFU/mL per day for 4 weeks)                                                                                                                                                                                                       | Decrease in pain and flatulence                                                                                                     | Human         | (99)              |
| <i>L. acidophilus</i> NCFM ( $10^9$ and $10^{10}$ CFU)                                                                                                                                                                                                                           | Improvement of IBS symptoms, average reduction of IBS-SSS sum score                                                                 | Human         | (100)             |
| <i>L. rhamnosus</i> , <i>L. plantarum</i> , <i>L. acidophilus</i> , <i>E. faecium</i> (50 mL dose containing $1 \times 10^{13}$ live bacteria)                                                                                                                                   | Improvement of IBS-SSS scores (from -63.3 87.9 and 28.3 81.2), of IBS symptoms in the probiotic group compared to placebo           | Human         | (101)             |
| <b>OBESITY</b>                                                                                                                                                                                                                                                                   |                                                                                                                                     |               |                   |
| <b>PROBIOTIC STRAINS</b>                                                                                                                                                                                                                                                         | <b>EFFECTS</b>                                                                                                                      | <b>TARGET</b> | <b>REFERENCES</b> |
| <i>Lactobacillus gasseri</i> SBT2055 ( $10^8$ CFU/g).                                                                                                                                                                                                                            | Reduction in visceral and subcutaneous fat, body weight and BMI                                                                     | Human         | (103)             |
| <i>L. fermentum</i> ( $1.08 \times 10^9$ CFU microencapsulated), <i>Lactobacillus amylovorus</i> ( $1.39 \times 10^9$ CFU microencapsulated)                                                                                                                                     | Reduction in total body fat mass                                                                                                    | Human         | (104)             |
| <i>S. thermophilus</i> , <i>L. delbrueckii</i> subsp. <i>bulgaricus</i> , <i>L. acidophilus</i> LA-5, <i>Bf. animalis</i> BB12                                                                                                                                                   | Reduction of total cholesterol, LDL and HDL cholesterol, serum triglyceride concentration                                           | Human         | (106)             |



|                                                                                                                                                                                                                                                                                                                                            |                                                                                                                                                                                                                                   |               |                   |
|--------------------------------------------------------------------------------------------------------------------------------------------------------------------------------------------------------------------------------------------------------------------------------------------------------------------------------------------|-----------------------------------------------------------------------------------------------------------------------------------------------------------------------------------------------------------------------------------|---------------|-------------------|
| <i>A. muciniphila</i>                                                                                                                                                                                                                                                                                                                      | Improvement of inflammation, insulin resistance and blood sugar through the role of epithelial barrier                                                                                                                            | Human         | (108)             |
| <i>A. muciniphila</i>                                                                                                                                                                                                                                                                                                                      | Reduction of: fat mass, body weight, liver steatosis, inflammation<br>Restoration of the function of the intestinal barrier, glucose resistance                                                                                   | Animal model  | (108)             |
| <b>DIABETES</b>                                                                                                                                                                                                                                                                                                                            |                                                                                                                                                                                                                                   |               |                   |
| <b>PROBIOTIC STRAINS</b>                                                                                                                                                                                                                                                                                                                   | <b>EFFECTS</b>                                                                                                                                                                                                                    | <b>TARGET</b> | <b>REFERENCES</b> |
| <i>L. reuteri</i> DSM 17938 (10 <sup>8</sup> CFU/d or 10 <sup>10</sup> CFU/d for 12 weeks).                                                                                                                                                                                                                                                | Increased ISI and DCA levels, related to improved insulin sensitivity<br>Increased microbial diversity                                                                                                                            | Human         | (114)             |
| <i>L. paracasei</i> HII01 (50 × 10 <sup>9</sup> CFU/day for 12 weeks)                                                                                                                                                                                                                                                                      | Reduction of FBG level, inflammatory markers such as TNF- $\alpha$ and IL-6, and hsCRP in 50 diabetic patients.                                                                                                                   | Human         | (115)             |
| <i>L. rhamnosus</i> LRA05 (10 <sup>9</sup> CFU/day)                                                                                                                                                                                                                                                                                        | 53.5% FBG and insulin resistance reduction<br>Relief of: liver oxidative stress and metabolic inflammation related to LPS levels in mice with T2DM<br>Increase in bacteria producing SCFA<br>Decrease in proinflammatory bacteria | Animal model  | (116)             |
| Camel milk probiotic compound (CPCM)= <i>Lactobacillus kefirianofaciens</i> , <i>L. plantarum</i> , <i>L. helveticus</i> , <i>Lc. lactis</i> <i>Issatchenkia orientalis</i> (Bacteria at 1x10 <sup>8</sup> -1x10 <sup>10</sup> CFU/mL; yeast at:1x10 <sup>6</sup> -1x10 <sup>8</sup> CFU/mL)                                               | Reduction of FBG, oral glucose tolerance<br>Regulation of intestinal flora disorders with improvement of liver and kidney damage in mice db/db                                                                                    | Animal model  | (117)             |
| <i>L. acidophilus</i> (2x10 <sup>9</sup> CFU), <i>L. casei</i> (7x10 <sup>9</sup> CFU), <i>L. bulgaricus</i> (2x10 <sup>8</sup> CFU), <i>L. rhamnosus</i> (1.5x10 <sup>9</sup> CFU), <i>Bf. breve</i> (3x10 <sup>10</sup> CFU), <i>B. longum</i> (7x 10 <sup>9</sup> CFU), <i>S. thermophiles</i> (1.5x10 <sup>9</sup> CFU) / FOS (100 mg) | Reduction of FPG, increase of HDL-C                                                                                                                                                                                               | Human         | (118)             |

| <b>METABOLIC SYNDROME</b>                                                                                             |                                                                                                                                                                                                                                             |               |                   |
|-----------------------------------------------------------------------------------------------------------------------|---------------------------------------------------------------------------------------------------------------------------------------------------------------------------------------------------------------------------------------------|---------------|-------------------|
| <b>PROBIOTIC STRAINS</b>                                                                                              | <b>EFFECTS</b>                                                                                                                                                                                                                              | <b>TARGET</b> | <b>REFERENCES</b> |
| <i>A. muciniphila</i>                                                                                                 | Degradation of mucin by stimulating the production of new mucus layer                                                                                                                                                                       | Human         | (108)             |
| <i>A. muciniphila</i>                                                                                                 | Immune and metabolic regulation with increased intestinal barrier<br>Production of SCFA                                                                                                                                                     | Human         | (93)              |
| <i>L. plantarum</i>                                                                                                   | Reduction of LDL-C, blood sugar and homocysteine and IL-6 in postmenopausal women                                                                                                                                                           | Human         | (120)             |
| <i>L. acidophilus</i> , <i>B. bifidum</i> , <i>B. lactis</i> , <i>B. longum</i> (1.5x10 <sup>9</sup> for each)/Inulin | Reduction of HDL-C, hyperglycemia and hypertension                                                                                                                                                                                          | Human         | (121)             |
| <b>MUSKULOSCHELETRIC DISEASES</b>                                                                                     |                                                                                                                                                                                                                                             |               |                   |
| <b>PROBIOTIC STRAINS</b>                                                                                              | <b>EFFECTS</b>                                                                                                                                                                                                                              | <b>TARGET</b> | <b>REFERENCES</b> |
| <i>L. casei</i>                                                                                                       | Reduction of pain and destruction of cartilage                                                                                                                                                                                              | Animal model  | (125)             |
| <i>L. casei</i> (10 <sup>8</sup> and 2x10 <sup>9</sup> CFU) <i>L. acidophilus</i> (2x10 <sup>9</sup> CFU)             | Antimicrobial, antioxidant, anti-inflammatory action<br>Reduction of joint swelling and pro-inflammatory cytokines (TNF- $\alpha$ , IL-17A, IL-17F, and IFN $\gamma$ )<br>Prevention of gastrointestinal dysbiosis and physiological stress | Human         | (126)             |
| <i>L. helveticus</i> MTCC 5463 (10 <sup>8</sup> CFU/mL), <i>S. thermophilus</i> MTCC 5460                             | Calcium increase                                                                                                                                                                                                                            | Human         | (127)             |
| <i>L. casei</i> Shirota                                                                                               | Recovery of joint strength                                                                                                                                                                                                                  | Human         | (128)             |
| <b>IMMUNE SYSTEM DISORDERS</b>                                                                                        |                                                                                                                                                                                                                                             |               |                   |
| <b>PROBIOTIC STRAINS</b>                                                                                              | <b>EFFECTS</b>                                                                                                                                                                                                                              | <b>TARGET</b> | <b>REFERENCES</b> |
| <i>E. faecium</i>                                                                                                     | Antitumor action<br>Bactericidal effect against <i>E. coli</i>                                                                                                                                                                              | Human         | (95)              |

|                             |                                                                                                                                                                                                                                                                  |              |       |
|-----------------------------|------------------------------------------------------------------------------------------------------------------------------------------------------------------------------------------------------------------------------------------------------------------|--------------|-------|
|                             | Production of anti-inflammatory cytokines (IL-10, IL-17, and IL-22)                                                                                                                                                                                              |              |       |
| <i>Li. reuteri</i> 100-23   | Development and recruitment of regulatory T cells in the gastrointestinal epithelium                                                                                                                                                                             | Animal model | (89)  |
| <i>L. rhamnosus</i> HDB1258 | Reduction of LPS-induced inflammation in mice through a suppression of LPS-induced TNF- $\alpha$ expression<br>Modification of intestinal microbiota composition with increase of Cyanobacteria and <i>Bacteroidetes</i> and reduction of <i>Deferribacteres</i> | Animal model | (129) |

**ADOS-CSS** (Autism Diagnostic Observation Schedule – Calibrated Severity Score) = standard assessment tool in autism research;

**ATEC** = Autism Treatment Evaluation Checklist;

**BDI** (Beck Depression Inventory) = depression assessment tool;

**BDNF** = brain-derived neurotrophic factor;

**BMI** = Body Mass Index;

**CRP** = C-reactive protein;

**CRP** = C-reactive protein;

**DCA** = secondary bile acid deoxycholic acid;

**FBG** = fasting blood glucose;

**FPG** = fasting plasma glucose;

**FST** (Forced Swim Test) = rodent depression assessment test;

**GABA** = gamma-aminobutyric acid;

**HDL** = High Density Lipoprotein.

**IBS-SSS (Irritable Bowel Disease-Severity Scoring System)** = questionnaire to assess the severity of symptoms of IBS

**IL** = interleukin;

**IL** = interleukin;

**ISI** = insulin sensitivity index;

**KYN** = Kynurenine;

**LDL** = ; Low Density Lipoprotein;

**LPS** = lipopolysaccharide,

**MDS-UPDRS** (Movement Disorder Society-Unified Parkinson's Disease Rating Scale) = Parkinson's disease rating scale.

**Mice db/db** = mice homozygous for a defect in the leptin receptor;

**MMSE** (Mini mental State Examination) = cognitive status assessment tool.

**ODD**, oppositional defiant disorder

**PBMC** = peripheral blood mononucleate cells;

**ROS** = reactive oxygen species;

**SCFA** = short chain fatty acids;

**SNAP-IV** = Attention Deficit Hyperactivity Disorder (ADHD) assessment test;

**SNS** = Sympathetic nervous system;

**T2DM** = Type 2 Diabetes Mellitus;

**TNF** = tumor necrosis factor;

**TRP** = Tryptophan.
